# Supplementary material for: Helicobacter pylori HP0377, a member of the Dsb family, is an untypical multifunctional CcmG that cooperates with dimeric thioldisulfide oxidase HP0231
Source: PubMed Central journal article supplement (PMC4491210; doi:10.1186/s12866-015-0471-z), 2015-07-04

**A**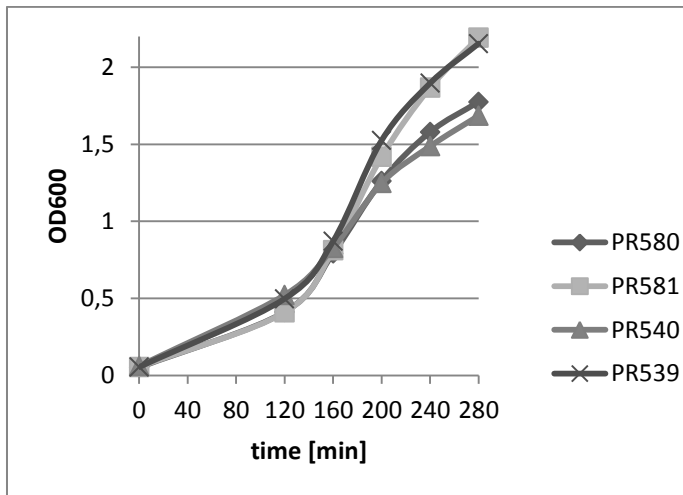**B**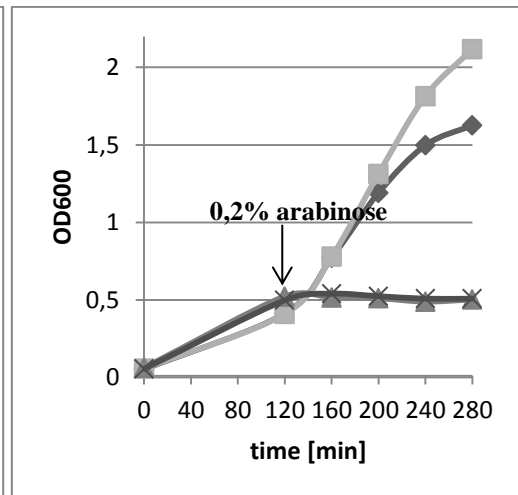

Supplement: 12866_2015_471_MOESM7_ESM.pdf [file 12866_2015_471_MOESM7_ESM.pdf]
